# Supplementary material for: Polymerase theta-helicase promotes end joining by stripping single-stranded DNA-binding proteins and bridging DNA ends
Source: bioRxiv or medRxiv preprint supplement (doi:10.1101/2021.06.03.446937), 2021-06-03
Supplement: Supplementary file [file media-1.pdf]

**SUPPLEMENTAL MATERIAL**

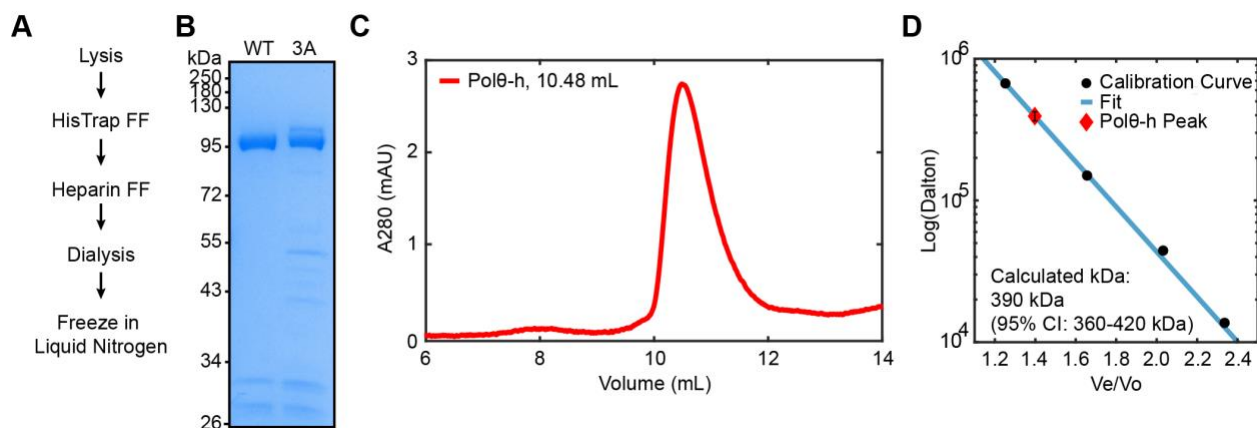

**Figure S1: Polθ-h purification and analysis.** (A) Schematic of the Polθ-h purification protocol. (B) SDS-PAGE gel of purified WT and 3A Polθ-h. The expected molecular weight is 99 kDa. (C) Superdex-200 chromatogram of recombinant homotetrameric Polθ-h. (D) Calculated molecular weight compared to a molecular weight standard (Sigma-Aldrich, 69385). Error bar within the diamond denotes a 95% confidence interval (CI).

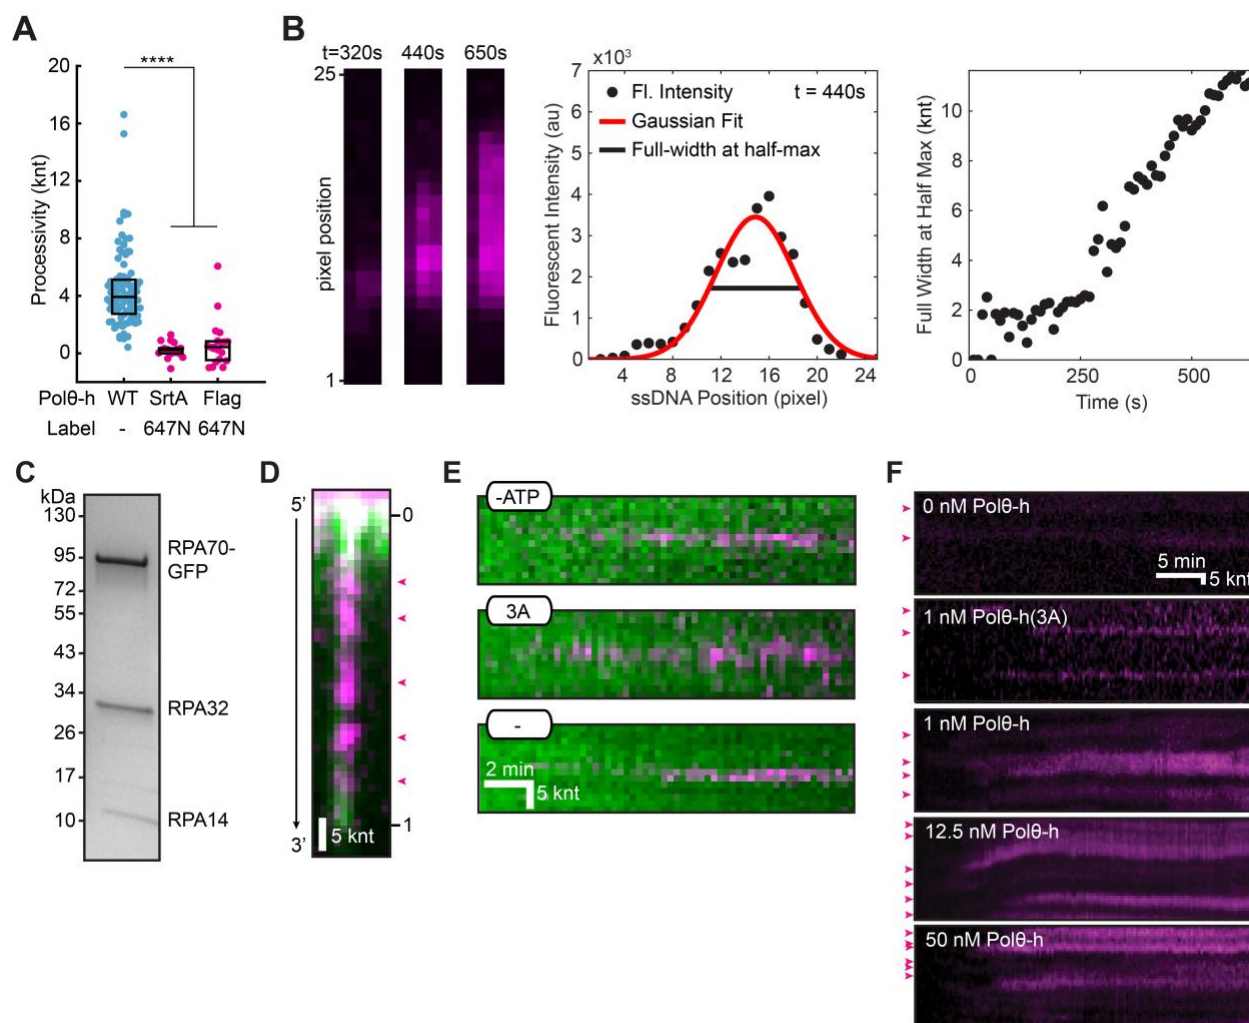

**Figure S2: Fluorescent analysis of Polθ-h variants and their translocation activities.** (A) We attempted to fluorescently label Polθ-h via sortase-mediated transpeptidation of the N-terminus or the linker region (C-terminus). N-terminal labeled Polθ-h was completely inactive. C-terminal Sortase (SrtA) or Flag epitope labeled Polθ-h constructs showed decreased processivity relative to WT Polθ-h on RPA coated ssDNA. Therefore, we focused on the WT Polθ-h for this study. Box displays median and IQR. (B) Summary of how Polθ-h translocation activity was analyzed via fluorescent proxies. Left: individual time points of fluorescent oligonucleotides hybridizing to the DNA. Middle: Gaussian fit of the resulting fluorescent signal. Right: A plot of the full width at half max of this fit as a function of time. (C) SDS-PAGE gel of recombinantly purified RPA-GFP. Expected molecular weights are 97, 29, and 14 kDa. (D) Analysis of Polθ-h RPA removal locations on single-tethered ssDNA curtains. Due to heterogeneity in their length, ssDNAs are normalized to unit length in a 5' to 3' direction. Magenta arrows show oligonucleotide foci that denote RPA removal activity. (E) Kymographs of Polθ-h-mediated RPA-GFP removal controls. ATP and hydrolysis activity are both required to see robust RPA removal. (F) Kymographs of concentration dependent Polθ-h oligonucleotide foci (magenta arrows) on RPA-GFP ssDNA curtains.

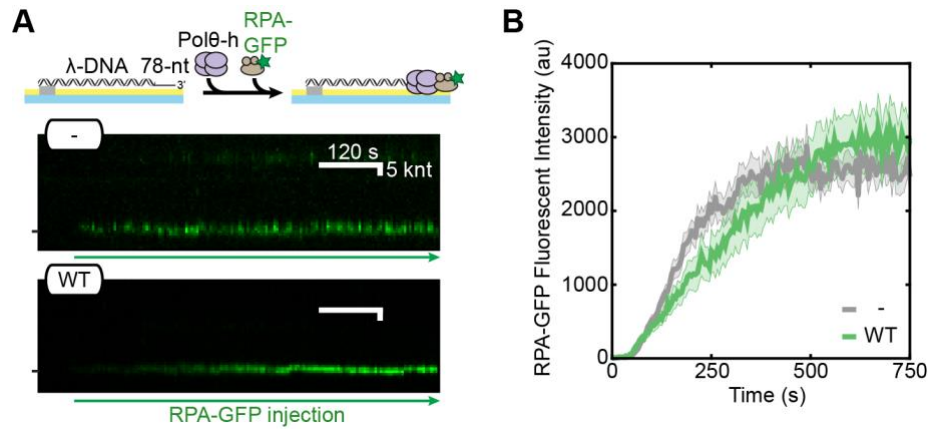

**Figure S3: Polθ-h is not a processive dsDNA helicase.** (A) Cartoon and kymographs of pre-resected helicase assay substrate in the presence and absence of Polθ-h WT. (B) RPA-GFP foci fluorescent intensity over time. WT (N=27) and without Polθ-h (-) (N=43).

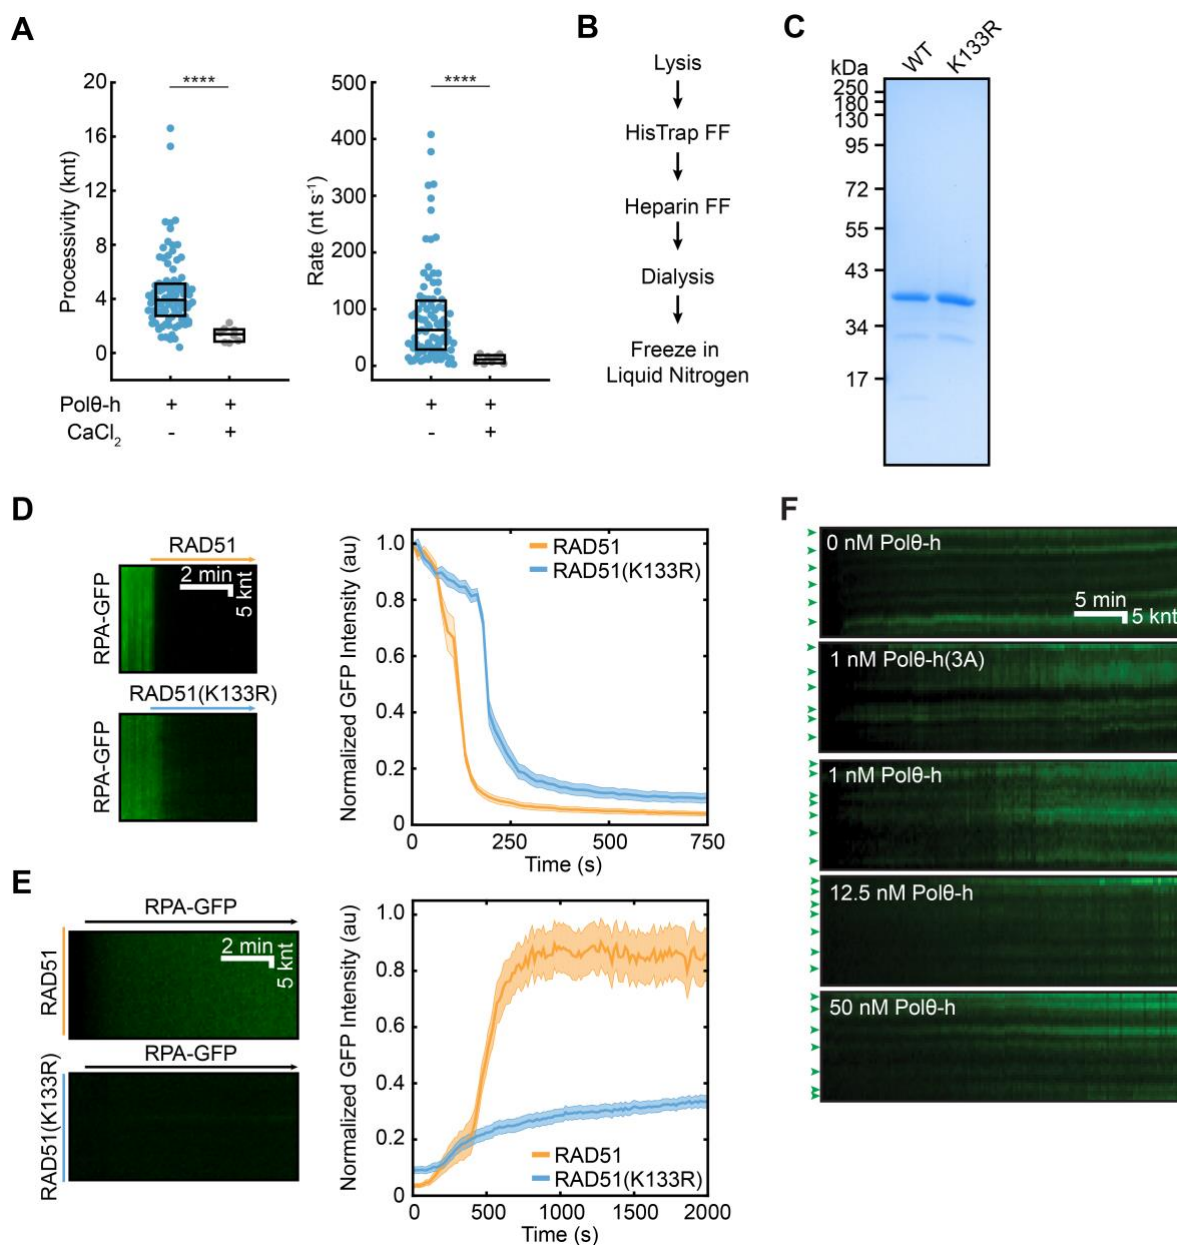

**Figure S4: Characterization of RAD51(K133R) and its exchange with RPA.** (A) Polθ-h is unable to remove RPA-GFP in the presence of CaCl<sub>2</sub>. Boxes display the median and IQR. (B) Schematic of the RAD51 purification protocol. (C) SDS-PAGE gel of recombinant WT RAD51 and RAD51(K133R). Expected molecular weights are 37 kDa. (D) Kymographs of RAD51 dependent removal of RPA-GFP (left). Quantification of normalized RPA-GFP fluorescence over time (right). We analyzed 25 DNA molecules for both WT RAD51 and RAD51(K133R). (E) RAD51(K133R) is resistant to replacement by RPA as compared WT RAD51. Left: kymographs of RAD51 filament turnover as monitored by RPA-GFP. Right: quantification of the normalized RPA-GFP fluorescence (N=25 for both conditions). (F) Kymographs of RPA-GFP foci (green arrows) on RAD51(K133R) ssDNA curtains at the indicated Polθ-h concentrations.

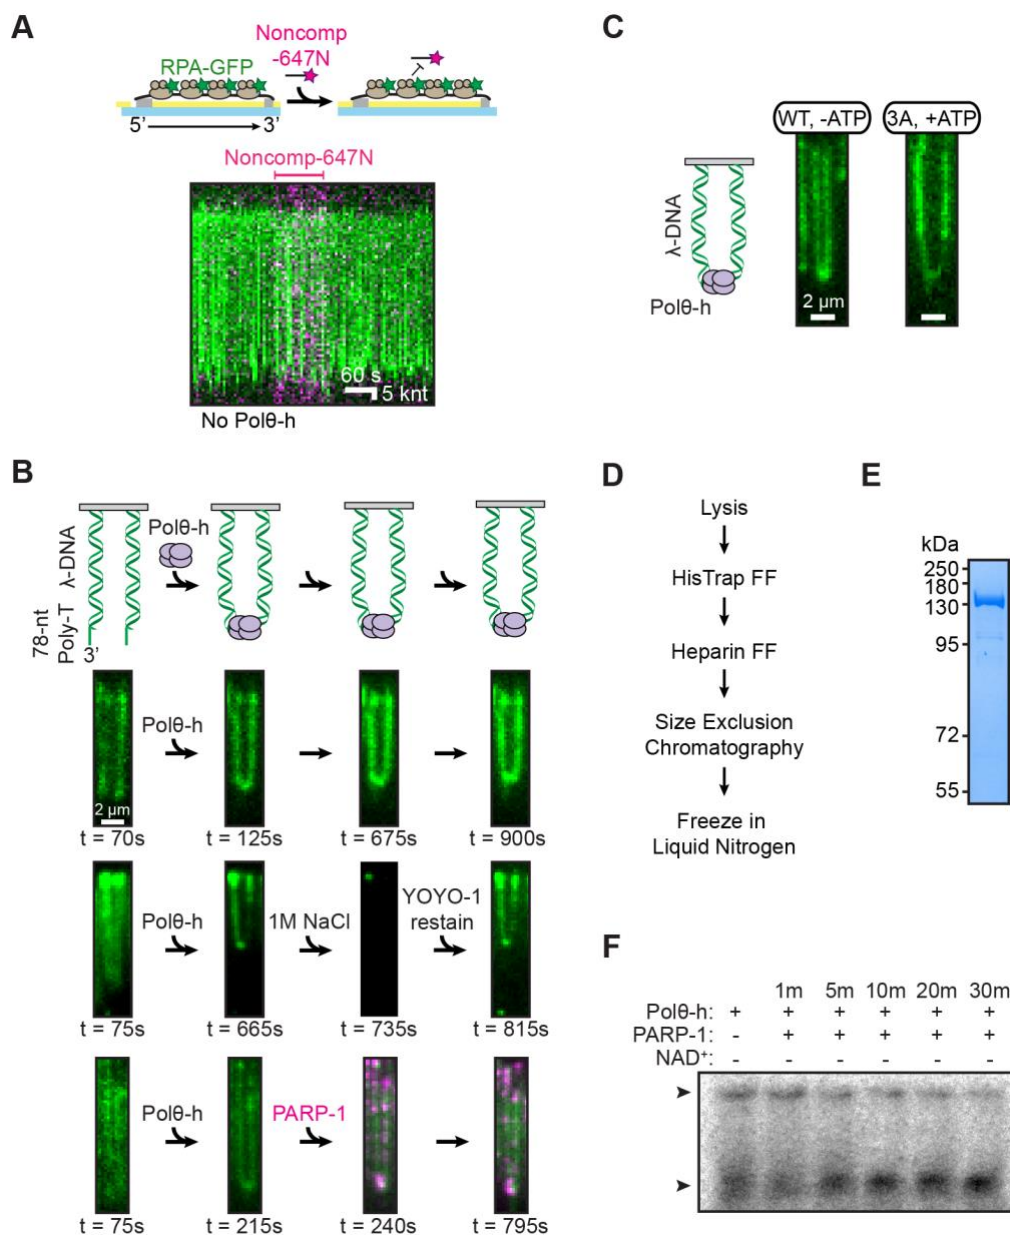

**Figure S5: DNA bridging requires Polθ-h and is ATP independent.** (A) Cartoon and kymograph of noncomplementary-647N (magenta) oligonucleotide injection in the absence of Polθ-h. ssDNA is bound with RPA-GFP (green). (B) Polθ-h tethering of two dsDNA ends persists for > 15 minutes and is resistant to 1M NaCl or the addition of PARP-1 (magenta) without NAD<sup>+</sup>. The dsDNA substrate is visualized with the intercalating dye YOYO-1 (green). (C) Polθ-h tethers two ssDNA oligos annealed to a dsDNA molecule in the absence of ATP. The ATPase mutant, Polθ-h(3A), also tethered DNA. The dsDNA substrate is visualized with the intercalating dye YOYO-1 (green). (D) Schematic of the PARP-1 purification protocol. (E) SDS-PAGE gel of recombinantly purified PARP-1. N-terminal expression tags remain attached. Expected molecular weight is 129 kDa. (F) Prebound Polθ-h and radiolabeled ssDNA oligonucleotide were incubated with PARP-1 without NAD<sup>+</sup> over time.

**Table S1: Pol0-h velocity and processivity on RPA-ssDNA**

| <b>Pol0-h</b> | <b>Nucleotide</b>      | <b>Processivity, knt (IQR)</b> | <b>Relative processivity decrease</b> | <b>Rate, nt s<sup>-1</sup> (IQR)</b> | <b>Relative rate decrease</b> | <b>N (foci)</b> |
|---------------|------------------------|--------------------------------|---------------------------------------|--------------------------------------|-------------------------------|-----------------|
| WT            | ATP                    | 3.9 (2.7-5.1)                  | -                                     | 63 (28-117)                          | -                             | 91              |
| WT            | -                      | 0.6 (0.1-1.2)                  | 7x                                    | 4 (2-12)                             | 16x                           | 57              |
| 3A            | ATP                    | 0.3 (0.1-0.5)                  | 13x                                   | 1 (0.5-4)                            | 63x                           | 46              |
| -             | ATP                    | 0.4 (0.1-0.5)                  | 10x                                   | 2 (0.2-5)                            | 32x                           | 55              |
| WT            | ATP / Ca <sup>2+</sup> | 1.4 (0.8-1.8)                  | 3x                                    | 11 (4-20)                            | 6x                            | 8               |
| SrtA-647N     | ATP                    | 0.2 (0-0.4)                    | 20x                                   | 5 (0-10)                             | 13x                           | 18              |
| Flag-647N     | ATP                    | 0.4 (-0.5-0.8)                 | 10x                                   | 10 (0-42)                            | 6x                            | 20              |

**Table S2: Quantification of Pol0-h foci on RPA-ssDNA**

| <b>Pol0-h</b> | <b>Concentration, nM</b> | <b>Average foci per 20 pixels (S.D.)</b> | <b>N (ssDNA molecules)</b> |
|---------------|--------------------------|------------------------------------------|----------------------------|
| WT            | 50                       | 3.8 (0.71)                               | 38                         |
| WT            | 12.5                     | 2.7 (0.83)                               | 36                         |
| WT            | 1                        | 1.0 (0.54)                               | 35                         |
| 3A            | 1                        | 0.56 (0.45)                              | 41                         |
| -             | 0                        | 0.37 (0.39)                              | 46                         |

**Table S3: Pol0-h velocity and processivity on RAD51(K133R) filaments**

| <b>Pol0-h</b> | <b>Nucleotide</b> | <b>Processivity, knt (IQR)</b> | <b>Relative processivity decrease</b> | <b>Rate, nt s<sup>-1</sup> (IQR)</b> | <b>Relative rate decrease</b> | <b>N (foci)</b> |
|---------------|-------------------|--------------------------------|---------------------------------------|--------------------------------------|-------------------------------|-----------------|
| WT            | ATP               | 1.3 (0.5-1.9)                  | -                                     | 8 (3-19)                             | -                             | 53              |
| 3A            | ATP               | 0.4 (0.3-0.6)                  | 3x                                    | 2 (0-4)                              | 4x                            | 41              |
| -             | ATP               | 0.5 (0.2-1.0)                  | 3x                                    | 3 (1-7)                              | 3x                            | 36              |

**Table S4: Quantification of Pol0-h foci on RAD51(K133R)-ssDNA**

| <b>Pol0-h</b> | <b>Concentration (nM)</b> | <b>Average foci per 20 pixels (S.D.)</b> | <b>N (ssDNA molecules)</b> |
|---------------|---------------------------|------------------------------------------|----------------------------|
| WT            | 50                        | 3.3 (0.63)                               | 38                         |
| WT            | 12.5                      | 3.0 (0.75)                               | 40                         |
| WT            | 1                         | 2.9 (0.70)                               | 43                         |
| 3A            | 1                         | 2.7 (0.43)                               | 27                         |
| -             | 0                         | 2.8 (0.41)                               | 44                         |

**Table S5: Oligonucleotides used in this study.**

| Oligonucleotide      | Sequence (5' to 3')                                    |
|----------------------|--------------------------------------------------------|
| Template             | /Phos/AG GAG AAA AAG AAA AAA AGA AAA GAA GG            |
| Primer               | /Biosg/TC TCC TCC TTC T                                |
| Comp-647N            | /AT647/AGG AGA AAA AGA AAA AAA GAA AAG AAG G           |
| Noncomp-647N         | /AT647/TCC TCT TTT TCT TTT TTT CTT TTC TTC C           |
| Poly-T <sub>50</sub> | T <sub>50</sub>                                        |
| NJ061                | GGG TTG CGG CCG CTT GGG                                |
| NJ062                | CCC AAG CGG CCG CAA CCC                                |
| LAB07                | /Phos/AGG TCG CCG CCC/BioTEG/                          |
| Lambda Poly-T        | /Phos/GGG CGG CGA CCT T <sub>78</sub>                  |
| IF724                | GGA GAA TTC CGA ACT GGG AGG ACC CAG ATC TGT CAT ACG C  |
| IF725                | GCG TAT GAC AGA TCT GGG TCC TCC CAG TTC GGA ATT CTC C  |
| IF733                | CTC CTA CAA GTG CTG GGG CGA CTC TTG TGG CAG            |
| IF734                | GGA ATG GTG GTT GTG GCT GCA TTA CAT ATG CTG GGA GAC TC |
